# Supplementary material
Source: PubMed Central journal article supplement (PMC4716812)

# Cisplatin Radiosensitization of DNA Irradiated with 2-20 eV Electrons: Role of Transient Anions

*Qianhong Bao,<sup>a</sup> Yunfeng Chen,<sup>a</sup> Yi Zheng<sup>a\*</sup> and Léon Sanche<sup>b</sup>*

<sup>a</sup>Research Institute of Photocatalysis, State Key Laboratory of Photocatalysis on Energy and Environment, Fuzhou University, Fuzhou 350002, P.R. China; <sup>b</sup>Group in the Radiation Sciences, Faculty of Medicine, Université de Sherbrooke, Sherbrooke, QC Canada J1H 5N4

## **SUPPLEMENT**

### **The analysis of DNA conformation by gel eletrophoresis**

Fig. 1A shows a scanned image of 1 % neutral agarose gel and the corresponding intensity profile for the analysis of cisplatin-DNA complexes, after exposure to  $5.6 \times 10^{11}$  electrons of 10 eV. The configurations of the bands and peaks are indicated on top. Peak 6 is a broad peak containing the concatemer and the linear forms. The poor resolution of two peaks corresponding to these conformations does not allow quantification of DSB yields.

Fig. 1B shows a scanned image of 1.3 % neutral agarose gel and its corresponding intensity profile for the same analysis of cisplatin-DNA complexes as that shown in Fig. 1A. In comparison, two peaks (6 and 7) corresponding to the linear and concatemeric configurations are resolved, suggesting that the application of a 1.3 % gel could better separate the linear from concatemer particularly for the cisplatin-DNA samples.

Fig. 1A) Analysis by 1% neutral agarose gel electrophoresis of cisplatin-DNA complexes after irradiation with 10 eV electrons. The configuration of each band is indicated. 1B) Analysis by 1.3% agarose gel electrophoresis of identical sample.

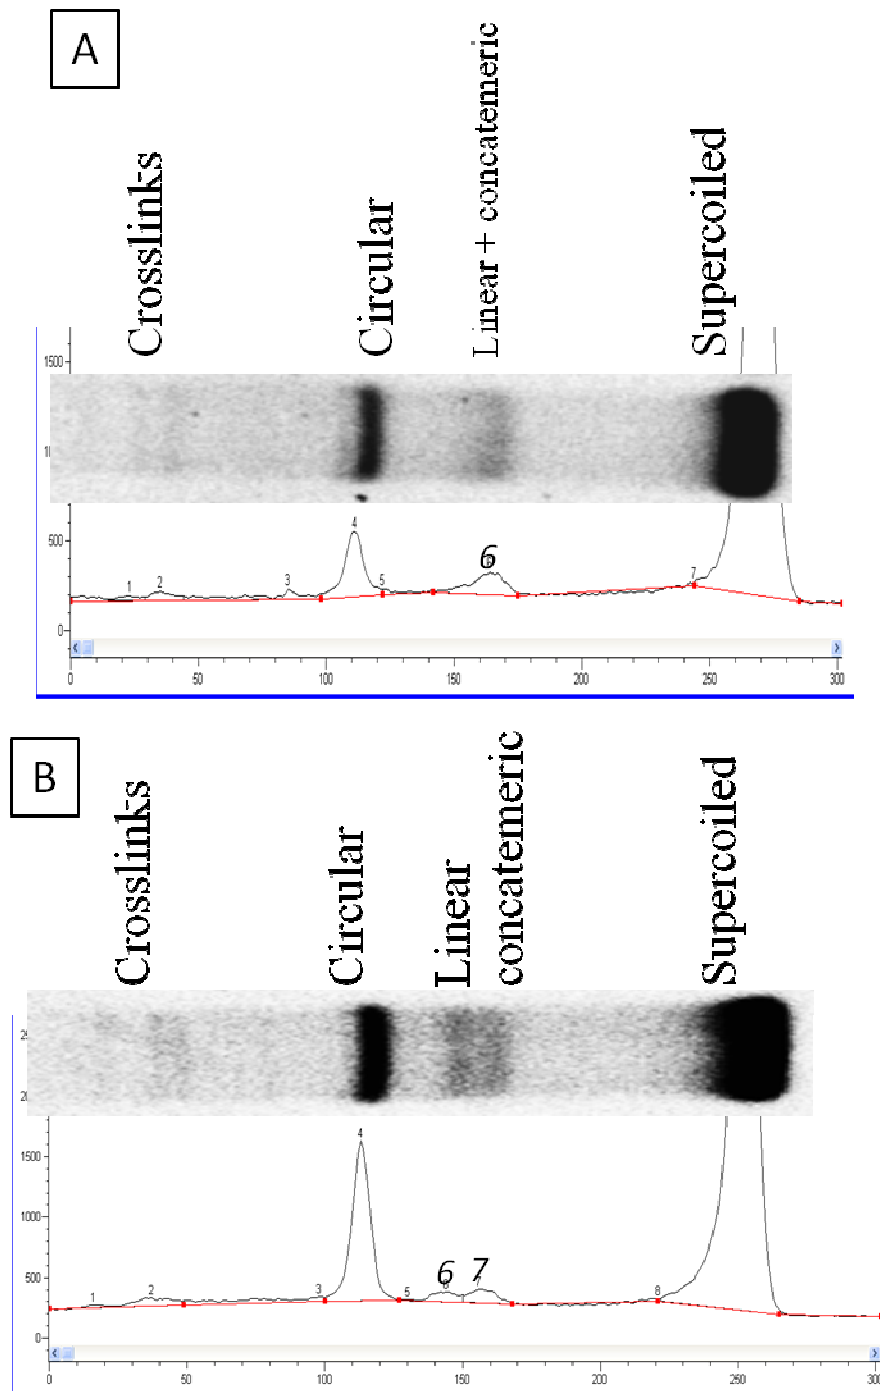

Supplement: NIHMS5264-supplement-Supporting_data.pdf [file NIHMS5264-supplement-Supporting_data.pdf]
